# Supplementary material for: Differentiation of Chinese liquors by using ambient glow discharge ionization mass spectrometry
Source: Royal Society of Chemistry journal article supplement (doi:10.1039/c3an00074e), 2013-01-01
Supplement: c3an00074e.pdf [file c3an00074e.pdf]

## Differentiation of Chinese Liquors by Using Ambient Glow

### Discharge Ionization mass spectrometry

Cheng Zhen<sup>1</sup>, Yueming Zhou<sup>1</sup>, NingZhang<sup>1</sup>, Jiyun Wang<sup>1</sup>, Zongxiu Nie<sup>1,2\*</sup>

1. Key Laboratory of Analytical Chemistry for Living Biosystems, Institute of Chemistry, Chinese Academy of Sciences, Beijing 100190, China; Beijing National Laboratory for Molecular Sciences, Beijing 100190, Beijing, China.

2. Beijing Mass Spectrometry Center, Beijing 100190, China.

\* Corresponding author. E-mail address: znie@iccas.ac.cn (Z.X. Nie).

### Supporting information

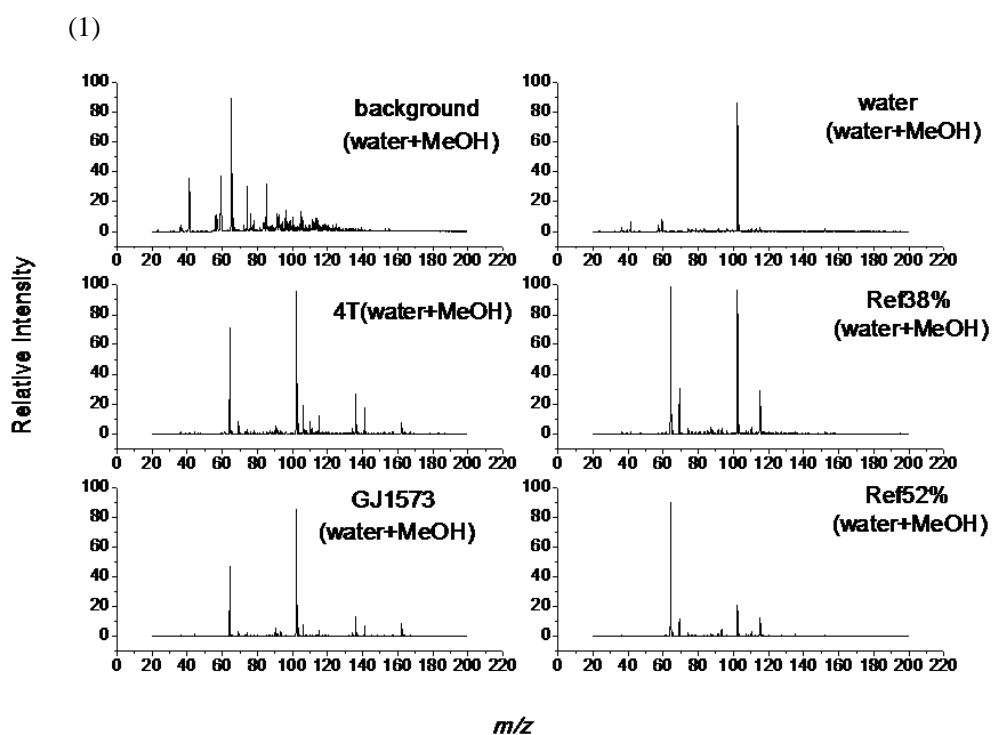

Figure S1. Several samples mass spectra obtained from EESI-MS

(2)

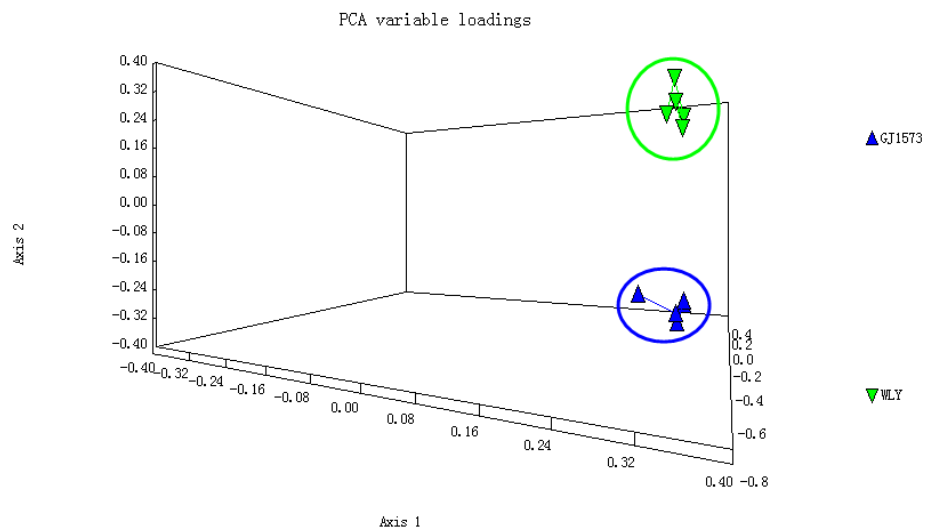

Figure S2. The PCA result of Guojiao 1573<sup>TM</sup> and Wuliangye<sup>TM</sup>

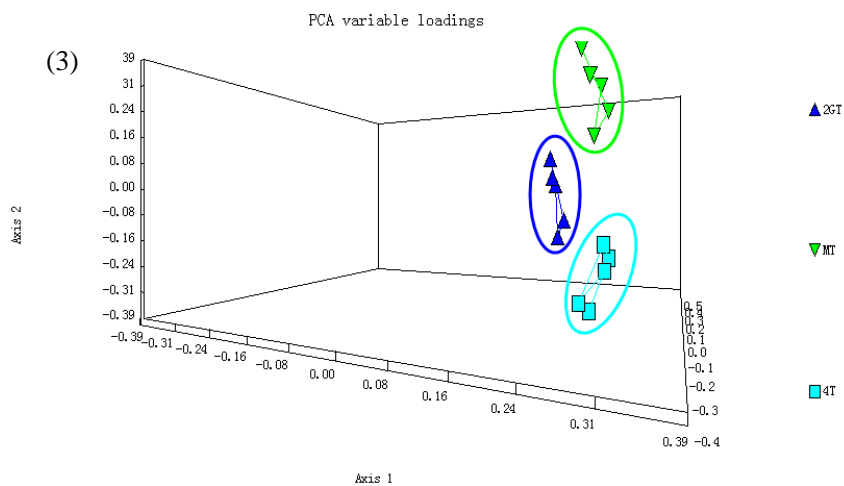

Figure S3. The PCA result of Erguotou<sup>TM</sup>, Moutai<sup>TM</sup> and SiTe<sup>TM</sup>

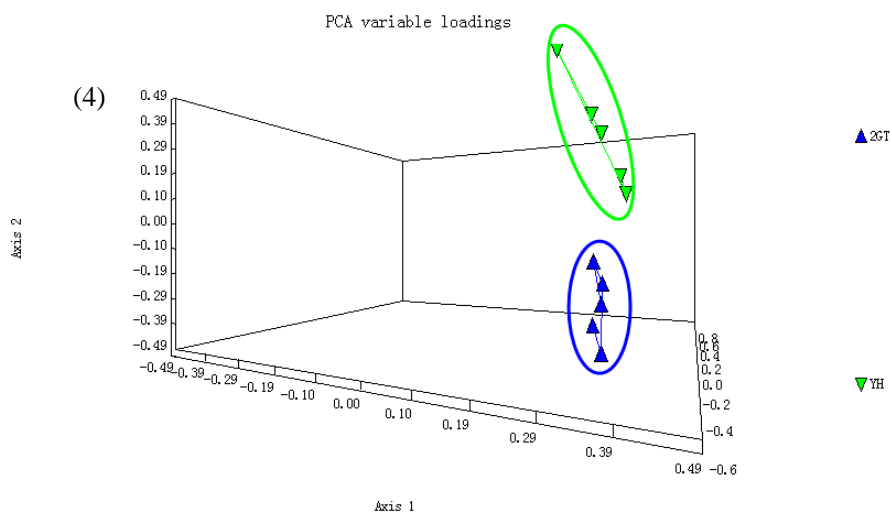

Figure S4. The PCA result of Red star Eerguotou<sup>TM</sup> and Yanghe Blue Classic<sup>TM</sup>

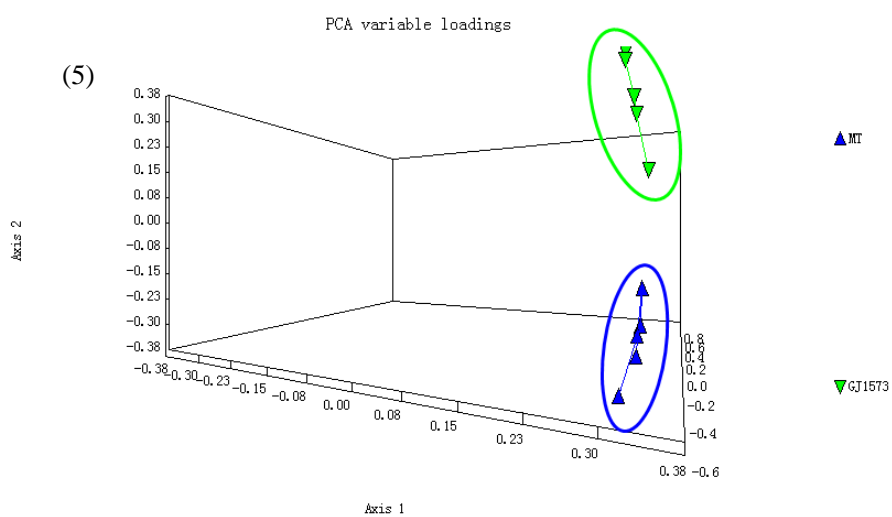

Figure S5. The PCA result of Guojiao 1573<sup>TM</sup> and MoutaiMoutai<sup>TM</sup>

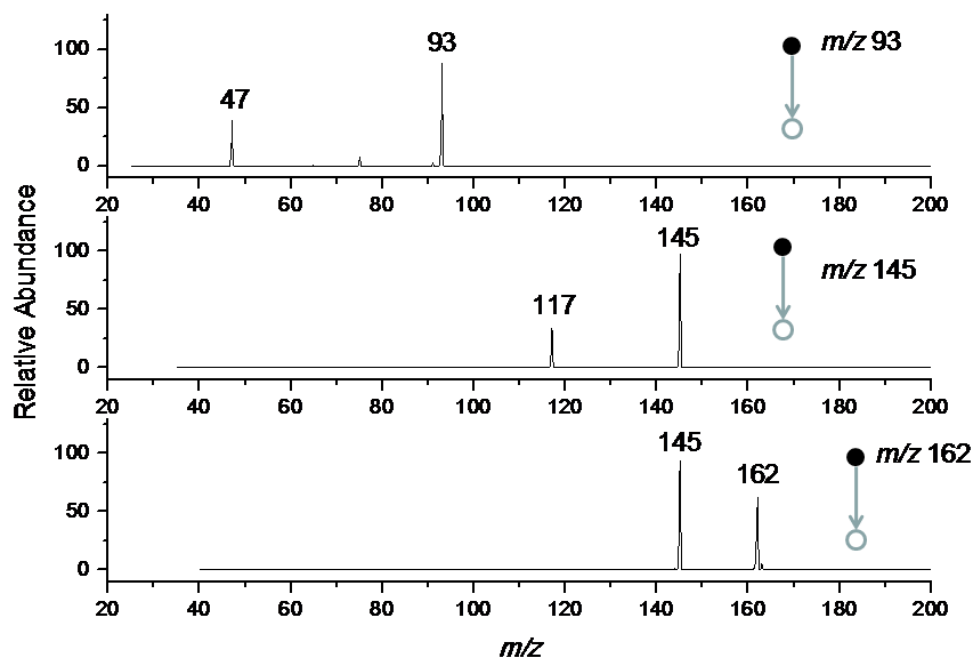

Figure S6. The CID analysis of ethanol dimer ( $m/z$  93) in the MS of SiTe wine and the CID analysis of ammonium adduct of ethyl caproate ( $m/z$  162) and ethyl caproate ( $m/z$  145)
